# Supplementary material for: Green and Effective Removal of Aqueous Graphene Oxide under UV-Light Irradiation
Source: PubMed Central journal article supplement (PMC6164349; doi:10.3390/nano8090654), 2018-08-24
Supplement: nanomaterials-08-00654-s001.pdf [file nanomaterials-08-00654-s001.pdf]

## Supplementary Information

# Green and Effective Removal of Aqueous Graphene Oxide under UV-Light Irradiation

Xiaoya Yuan \*, Dong Peng, Qiuye Jing, Jiawei Niu, Xin Cheng, Zijuan Feng and Xue Wu

College of Materials Science and Engineering, Chongqing Jiaotong University, Chongqing 400074, China; pd19931123@163.com (D.P.); m15922871980@163.com (Q.J.); Niujw2018@163.com (J.N.); cx1241513800@163.com (X.C.); fzj616@126.com (Z.F.); snowly199303@163.com(X.W.)

\* Correspondence: yuanxy@cqjtu.edu.cn (X.Y.); Tel./Fax: +86-23-62789154

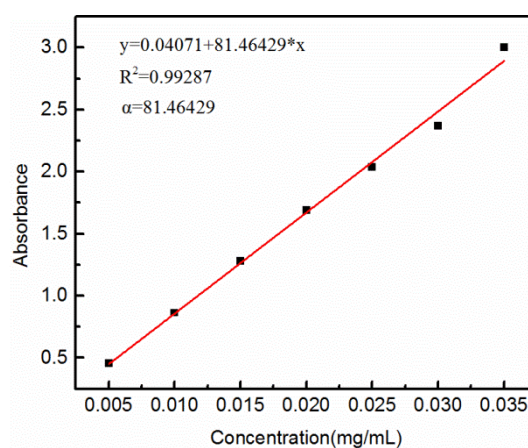

Figure S1. The correlation between GO concentration and its UV absorbance intensity at 300 nm.
